# Supplementary material for: Gas sorption porosimetry for the evaluation of hard carbons as anodes for Li- and Na-ion batteries
Source: publisher site journal article supplement (doi:10.3762/bjnano.11.106), 2020-08-14
Supplement: Additional file 1 [file 2190-4286-11-106-S1.pdf]

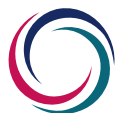

## Supporting Information

for

### **Gas sorption porosimetry for the evaluation of hard carbons as anodes for Li- and Na-ion batteries**

Yuko Matsukawa, Fabian Linsenmann, Maximilian A. Plass, George Hasegawa, Katsuro Hayashi and Tim-Patrick Fellingner

*Beilstein J. Nanotechnol.* **2020**, *11*, 1217–1229. doi:10.3762/bjnano.11.106

## Additional figures

Total Publications  
**4.907** Analyze

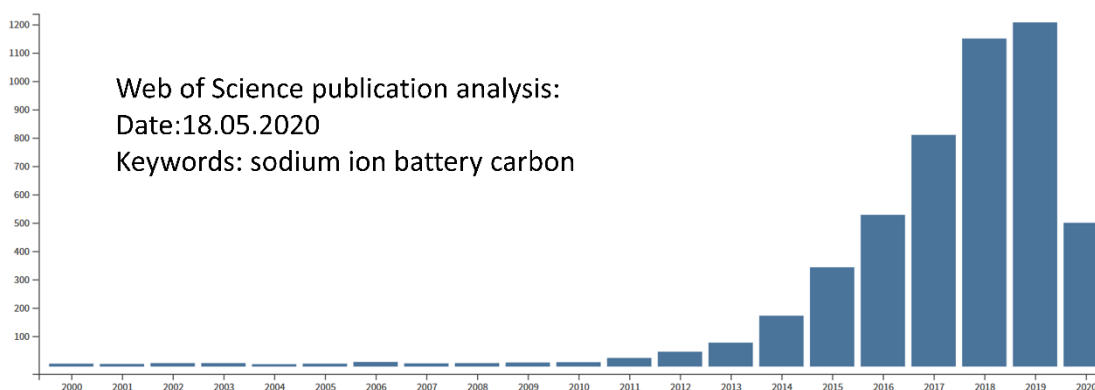

**Figure S1:** Publication trend since the year 2000 on carbons for SIBs according to Web of Science.

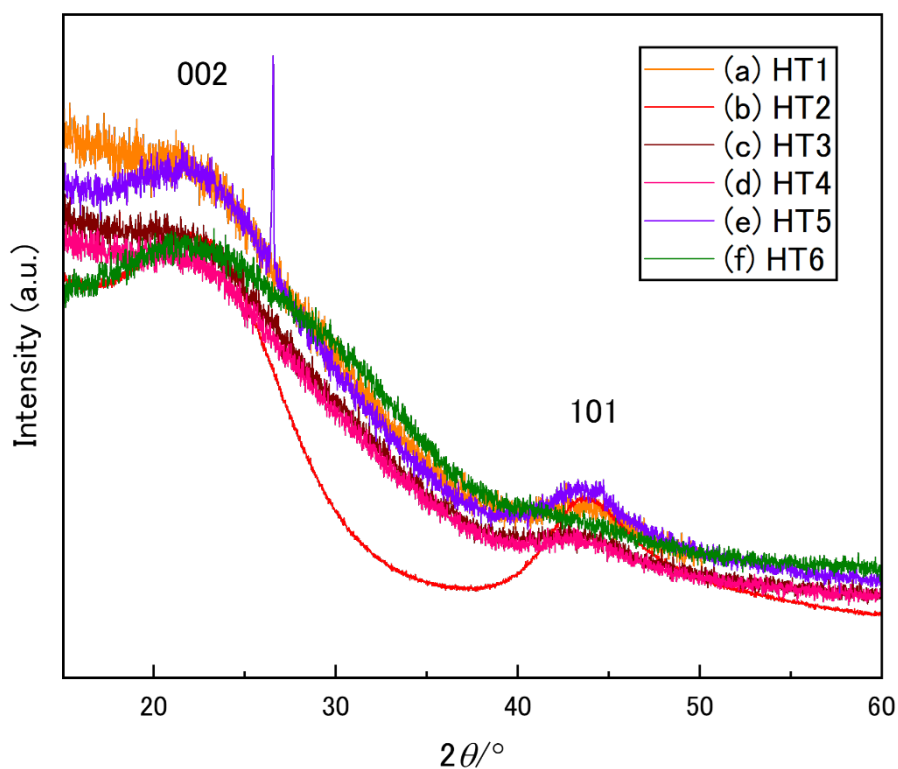

**Figure S2:** Powder X-ray diffraction pattern of HT2.  $d_{002} = 4.02 \text{ \AA}$  ( $2\theta = 22.1^\circ$ ),  $d_{101} = 2.06 \text{ \AA}$  ( $2\theta = 43.9^\circ$ ).

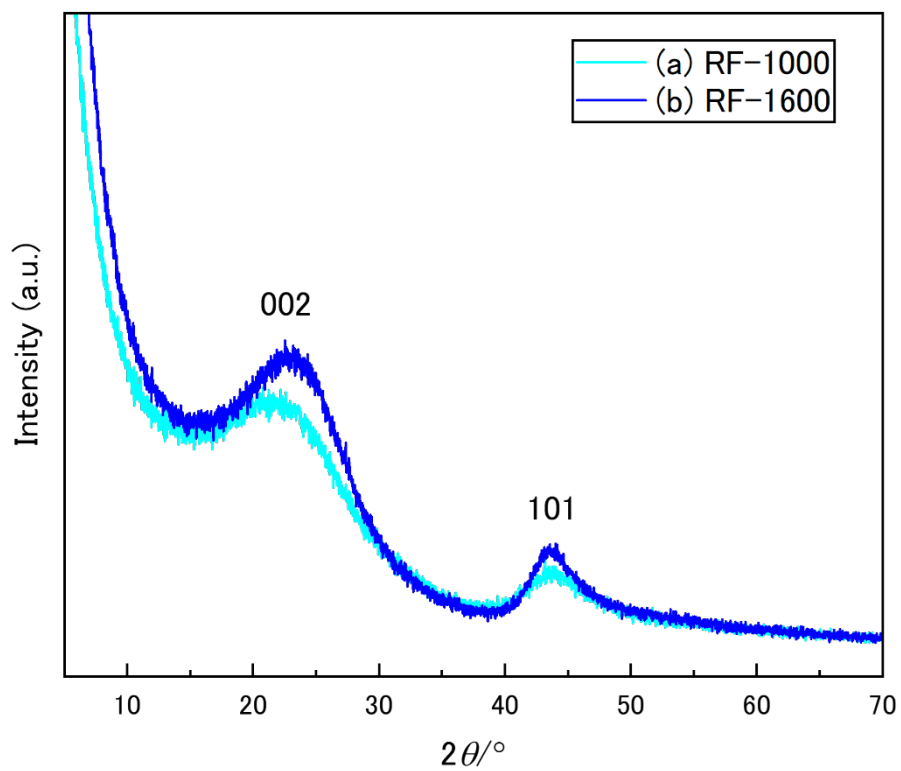

**Figure S3:** Powder X-ray diffraction patterns of (a) RF-1000 and (b) RF-1600. (a)  $d_{002} = 4.28 \text{ \AA}$  ( $2\theta = 20.8^\circ$ ),  $d_{101} = 2.09 \text{ \AA}$  ( $2\theta = 43.2^\circ$ ), (b)  $d_{002} = 3.94 \text{ \AA}$  ( $2\theta = 22.5^\circ$ ),  $d_{101} = 2.06 \text{ \AA}$  ( $2\theta = 44.0^\circ$ ).

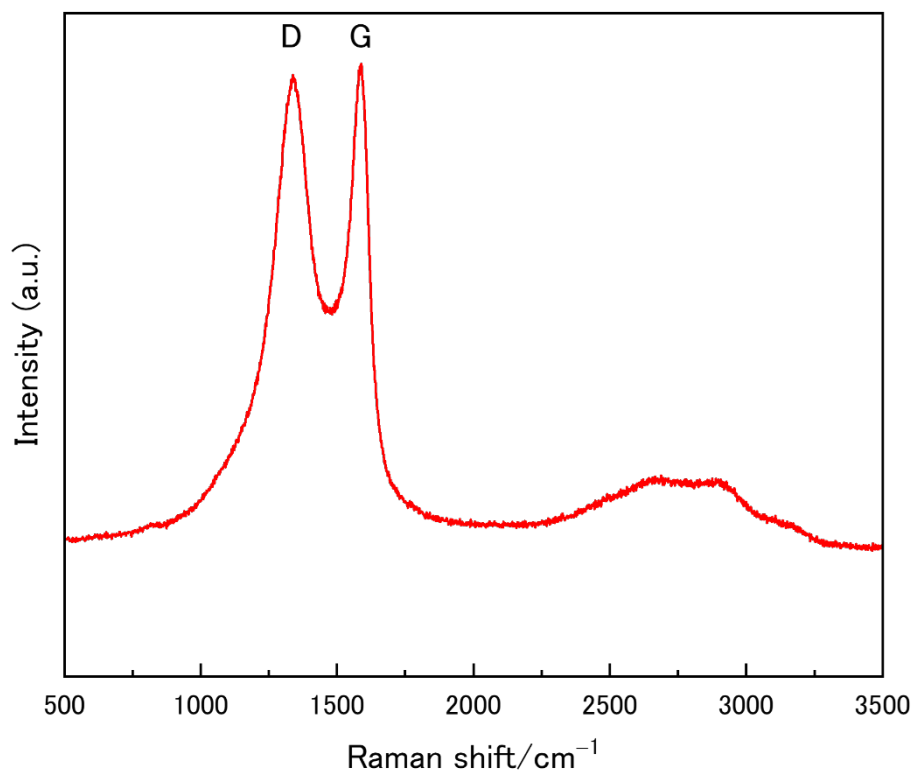

**Figure S4:** Raman spectrum of HT2.  $I_D/I_G = 0.98$ .

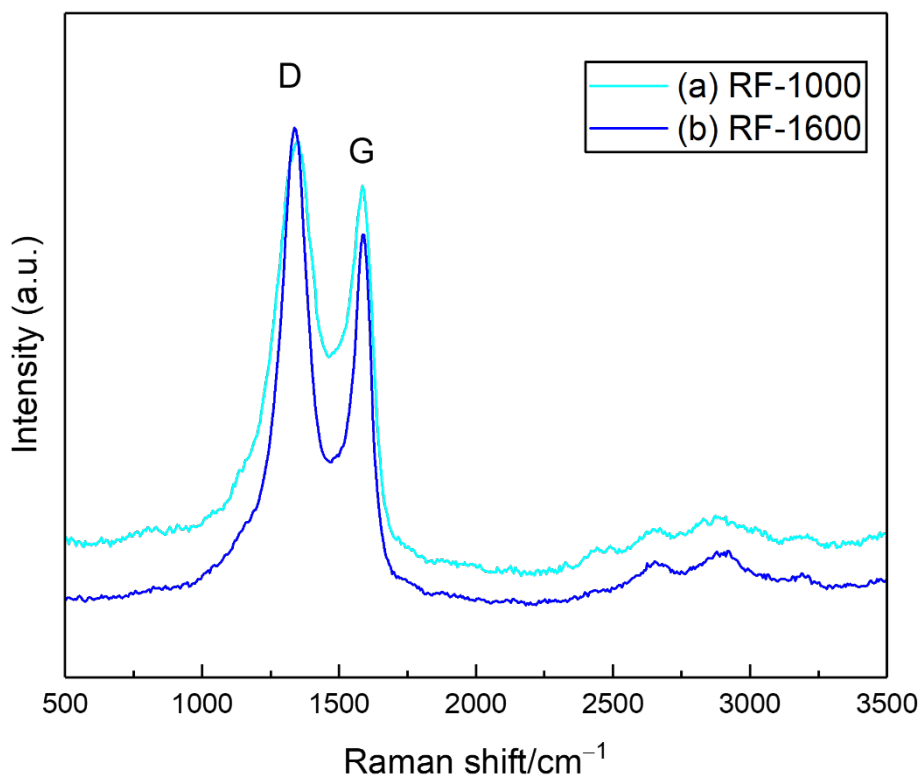

**Figure S5:** Raman spectra of (a) RF-1000 and (b) RF-1600. (a)  $I_D/I_G = 1.12$ , (b)  $I_D/I_G = 1.29$ . c) Micropore size distributions of the carbons calcined at different temperatures obtained from the corresponding  $N_2$  isotherms by the Horvath–Kawazoe (HK) method. The carbons treated above 1600 °C possessed negligible micropores.

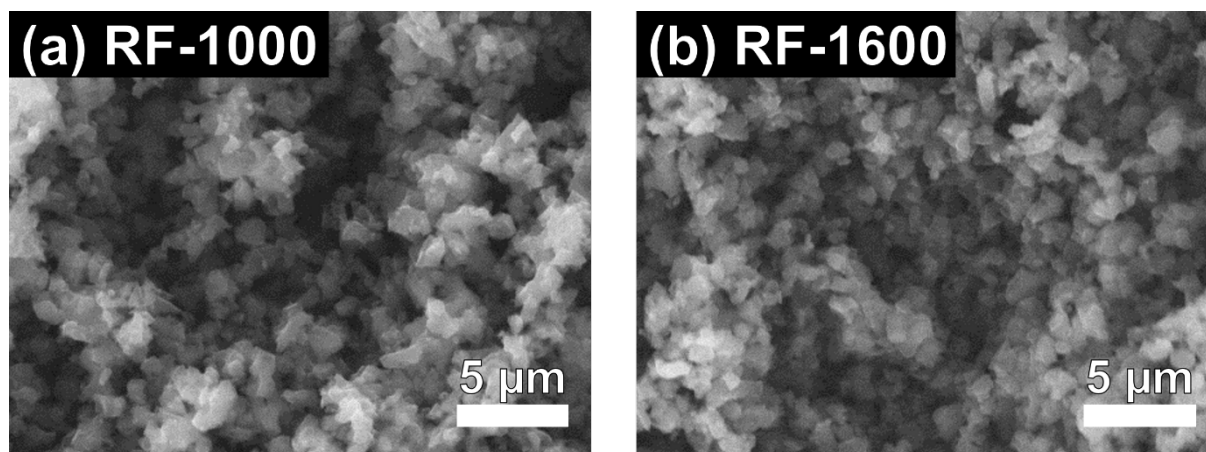

**Figure S6:** SEM images of RF carbons. (a) RF-1000, (b) RF-1600.

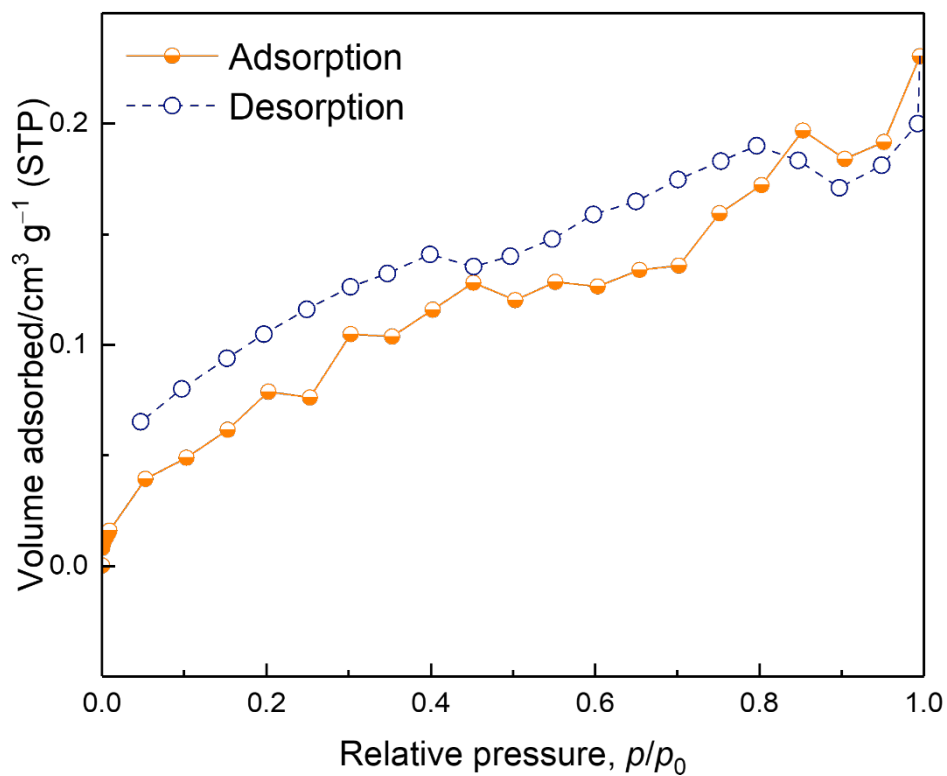

**Figure S7:** Failed N<sub>2</sub> sorption isotherms of HT1.

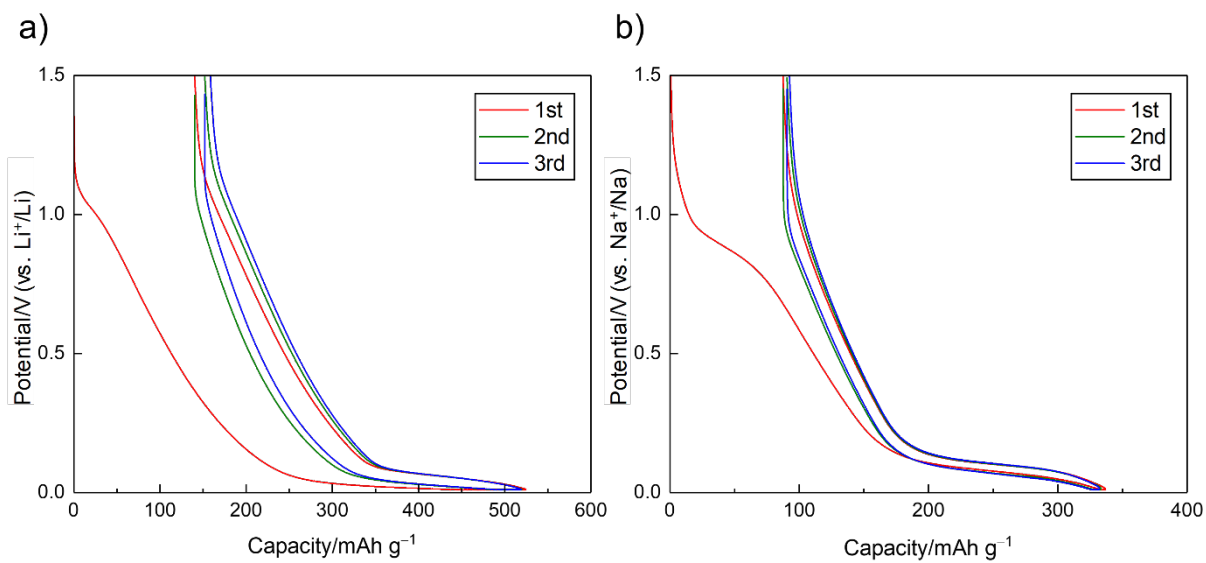

**Figure S8:** Charge-discharge curves of HT2 vs (a) Li and (b) Na metal electrode.
